# Supplementary material
Source: Springer Nature journal article supplement (https://www.springermedizin.de/resource/supplementary/12936_2006_245_MOESM29_ESM.pdf/9547286)

pH4.0

9.0

94-

68-

43-

30-

20-

14-

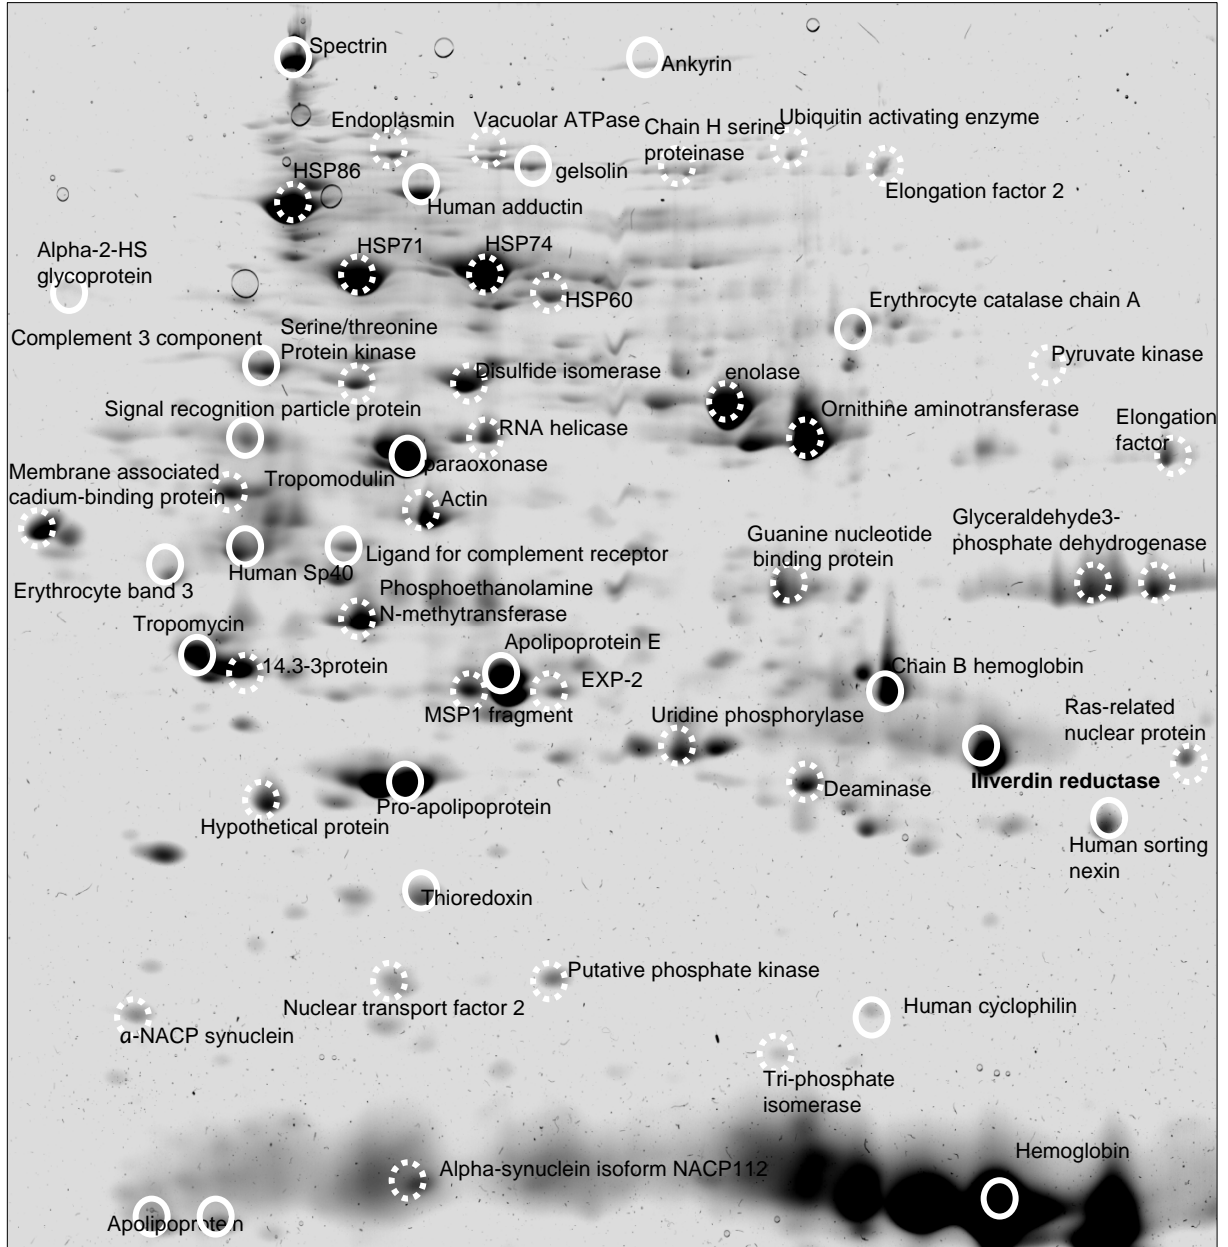

Supplement: MOESM29 [file 9547286]
